# Supplementary material for: Imaging-Based Screen Identifies Laminin 411 as a Physiologically Relevant Niche Factor with Importance for i-Hep Applications
Source: PubMed Central journal article supplement (PMC5919292; doi:10.1016/j.stemcr.2018.01.025), 2018-03-01
Supplement: mmc1.pdf [file mmc1.pdf]

**Stem Cell Reports, Volume 10**

## **Supplemental Information**

### **Imaging-Based Screen Identifies Laminin 411 as a Physiologically Relevant Niche Factor with Importance for i-Hep Applications**

**John Ong, Maria Paola Serra, Joe Segal, Ana-Maria Cujba, Soon Seng Ng, Richard Butler, Val Millar, Stephanie Hatch, Salman Zimri, Hiroyuki Koike, Karen Chan, Andrew Bonham, Michelle Walk, Ty Voss, Nigel Heaton, Ragai Mitry, Anil Dhawan, Daniel Ebner, Davide Danovi, Hiromitsu Nakauchi, and S. Tamir Rashid**

**Table S1. Details of hepatocyte donors, i-Hep cell lines and negative controls, related to text in Results.**

| <b>Adult Livers - History of liver disease, Hepatitis B, Hepatitis C and HIV excluded</b>      |                  |                   |                                      |                                                             |
|------------------------------------------------------------------------------------------------|------------------|-------------------|--------------------------------------|-------------------------------------------------------------|
| Age of Donor                                                                                   | Race             | Gender            | Cell Viability                       | Comments                                                    |
| 21 years old                                                                                   | Caucasian        | Male              | 90%                                  | Tobacco: Yes<br>Alcohol: No<br>BMI 30                       |
| 21 years old                                                                                   | Caucasian        | Male              | 88%                                  | Tobacco: Yes<br>Alcohol: 2 units/week<br>BMI 24, Heroin use |
| 29 years old                                                                                   | Caucasian        | Male              | 93%                                  | Tobacco use: No<br>Alcohol: No<br>BMI 25.5                  |
| 30 years old                                                                                   | African-American | Female            | 89%                                  | Tobacco: No<br>Alcohol: No<br>BMI 33.2                      |
| 34 years old                                                                                   | Caucasian        | Female            | 95%                                  | Tobacco use: Yes<br>Alcohol: No<br>BMI 26                   |
| 39 years old                                                                                   | Caucasian        | Male              | 92%                                  | Tobacco: Yes<br>Alcohol: 2 units/week<br>BMI 21, Heroin use |
| 46 years old                                                                                   | Caucasian        | Female            | 90%                                  | Tobacco: No<br>Alcohol: No<br>BMI 24.0                      |
| 48 years old                                                                                   | Hispanic         | Female            | 90%                                  | Tobacco: No<br>Alcohol: No<br>BMI 25.4                      |
| 30 years old                                                                                   | African-American | Male              | 91%                                  | Tobacco: No<br>Alcohol: No<br>BMI: 20.3                     |
| <b>Paediatric Livers - History of liver disease, Hepatitis B, Hepatitis C and HIV excluded</b> |                  |                   |                                      |                                                             |
| Age of Donor                                                                                   | Race             | Gender            | Cell Viability                       | Comments                                                    |
| 1 month old                                                                                    | Hispanic         | Male              | 83%                                  | Unknown                                                     |
| 14 month old                                                                                   | Caucasian        | Female            | 94%                                  | BMI 20.7                                                    |
| 20 months                                                                                      | Caucasian        | Female            | 90%                                  | BMI 21                                                      |
| 11 years old                                                                                   | Caucasian        | Male              | 86%                                  | Unknown                                                     |
| <b>Fetal Livers (Maternal serology negative for Hepatitis B, Hepatitis C and HIV)</b>          |                  |                   |                                      |                                                             |
| Age of Donor                                                                                   | Race             | Gender            | Cell Viability                       | Comments                                                    |
| 19 weeks                                                                                       | Caucasian        | Unknown           | 78%                                  | Termination of pregnancy                                    |
| 21 weeks                                                                                       | Caucasian        | Unknown           | 82%                                  | Termination of pregnancy                                    |
| 20 weeks                                                                                       | Caucasian        | Unknown           | 80%                                  | Termination of pregnancy                                    |
| 17 weeks                                                                                       | Caucasian        | Unknown           | 85%                                  | Termination of pregnancy                                    |
| <b>Negative Controls</b>                                                                       |                  |                   |                                      |                                                             |
| Sample                                                                                         | Age of Donor     | Race, Gender      | Comments                             |                                                             |
| Fibroblast 1                                                                                   | 51 years old     | Caucasian, female | Isolated from skin                   |                                                             |
| Fibroblast 2                                                                                   | 44 years old     | Caucasian, female | Isolated from skin                   |                                                             |
| Fibroblast 3                                                                                   | 40 years old     | Caucasian         | Isolated from foreskin of adult male |                                                             |
| iPS RMA                                                                                        | 50years old      | Male              | Undifferentiated iPS cell line       |                                                             |
| IPS HDB                                                                                        | Unknown          | Unknown           | Undifferentiated iPS cell line       |                                                             |
| DU145                                                                                          | Unknown          | Unknown           | Prostate Cancer Cell Line            |                                                             |

**iPS derived Hepatocytes (i-Heps)**

|         |                                                        |
|---------|--------------------------------------------------------|
| i-Hep 1 | Wild-type (Rashid et al JCI 2010)                      |
| i-Hep 2 | Alpha-1 antitrypsin deficiency (Rashid et al JCI 2010) |
| i-Hep 3 | Wild-type (TkDA Takebe et al Nature 2013)              |

**Table S2. List of ECM / Niche Factors Tested, related to text in Results section.**

| S/N | Protein / Peptide                                      | Source, Catalogue number       |
|-----|--------------------------------------------------------|--------------------------------|
| 1   | Human Collagen-1                                       | Abcam Ab7533                   |
| 2   | Human Collagen-2                                       | Abcam Ab 7534                  |
| 3   | Human Collagen-3                                       | Abcam Ab 7535                  |
| 4   | Human Collagen-4                                       | Abcam Ab7536                   |
| 5   | Human Fibronectin                                      | Merck Millipore FC010          |
| 6   | Human Laminin 111                                      | Biolamina, Lamscreen KT202     |
| 7   | Human Laminin 211                                      | Biolamina, Lamscreen KT202     |
| 8   | Human Laminin 332                                      | Biolamina, Lamscreen KT202     |
| 9   | Human Laminin 411                                      | Biolamina, Lamscreen KT202     |
| 10  | Human Laminin 421                                      | Biolamina, Lamscreen KT202     |
| 11  | Human Laminin 511                                      | Biolamina, Lamscreen KT202     |
| 12  | Human Laminin 521                                      | Biolamina, Lamscreen KT202     |
| 13  | Human CYR61                                            | R&D systems, 4055-CR-050       |
| 14  | Human LRRCC17                                          | Abcam, Ab 160894               |
| 15  | Human Vitronectin                                      | R&D systems, 2308-VN-050       |
| 16  | Human Wnt3a                                            | R&D systems, 5036-WN-010       |
| 17  | Human Wnt5a                                            | R&D systems, 645-WN-010        |
| 18  | Human Wnt 5b                                           | R&D systems, 7347-WN-025       |
| 19  | Human Wnt7a                                            | R&D systems, 3008-WN-025       |
| 20  | Mouse Wnt9a                                            | R&D systems, 8148-WN-025       |
| 21  | Mouse Wnt9b                                            | Stanford University, Nusse Lab |
| 22  | Human EGFL7                                            | Abcam, Ab 218567               |
| 23  | Human Interleukin 3                                    | R&D systems, 203-IL-010        |
| 24  | Human Interleukin 4                                    | R&D systems, 6507-IL-010       |
| 25  | Human Interleukin 6                                    | R&D systems, 7270-IL-025       |
| 26  | Adrenaline                                             | Sigma Aldrich, Y0000882        |
| 27  | Serotonin                                              | Sigma Aldrich, H9523           |
| 28  | Levothyroxine                                          | Sigma Aldrich, L0570000        |
| 29  | Dexamethasone                                          | Sigma Aldrich, D4902-25MG      |
| 30  | Insulin                                                | Sigma Aldrich, I3536           |
| 31  | Ascorbic acid                                          | Sigma Aldrich, PHR1008-2G      |
| 32  | Protein ORLA 153 (RGDS sequence)                       | ORLA Proteins, ORLA 153        |
| 33  | Protein ORLA 164 (PHSRN sequence)                      | ORLA Proteins ORLA 164         |
| 34  | Protein ORLA 208 (CS3/Variable domain)                 | ORLA Proteins ORLA 208         |
| 35  | Protein ORLA 162 (IKVAV sequence)                      | ORLA Proteins ORLA 162         |
| 36  | Protein ORLA 187 (VQLRNGFPYFSY sequence)               | ORLA Proteins ORLA 187         |
| 37  | Protein ORLA 188 (GLLFYMARINHA sequence)               | ORLA Proteins ORLA 188         |
| 38  | Protein ORLA 189 (IKVSV sequence)                      | ORLA Proteins ORLA 189         |
| 39  | Protein ORLA 163 (YIGSR sequence)                      | ORLA Proteins ORLA 163         |
| 40  | Protein ORLA 165 (MNYYSNS sequence)                    | ORLA Proteins ORLA 165         |
| 41  | Protein ORLA 185 (GTPGPQGIAGQRW sequence)              | ORLA Proteins ORLA 185         |
| 42  | Protein ORLA 186 (VEGF mimetic)                        | ORLA Proteins ORLA 186         |
| 43  | Protein ORLA 175 (IPKASSVPTELSAISMLYYLDENEKVVVK)       | ORLA Proteins ORLA 175         |
| 44  | Protein ORLA 176 (PQVTRGDVFTM sequence)                | ORLA Proteins ORLA 176         |
| 45  | Protein ORLA 177 (KKQRFHRNRKGYRSQ sequence)            | ORLA Proteins ORLA 177         |
| 46  | Protein ORLA 178 (VDTYDGRGDSVVYGLRSKSK sequence)       | ORLA Proteins ORLA 178         |
| 47  | Protein ORLA 174 (FHRIKA Heparin binding)              | ORLA Proteins ORLA 174         |
| 48  | Protein ORLA 179 (VFDNFVLK sequence)                   | ORLA Proteins ORLA 179         |
| 49  | Protein ORLA 90 (Fibroblast Growth Factor 1 - acidic)  | ORLA Proteins ORLA 90          |
| 50  | Protein ORLA 128 (Fibroblast Growth Factor 2 - basic)  | ORLA Proteins ORLA 128         |
| 51  | Protein ORLA 181 (Fibroblast Growth Factor 4)          | ORLA Proteins ORLA 181         |
| 52  | Protein ORLA 183 (Stem Cell Factor soluble kit ligand) | ORLA Proteins ORLA 183         |
| 53  | Protein ORLA 184 (Sonic hedgehog)                      | ORLA Proteins ORLA 184         |
| 54  | Protein ORLA 167 (Epidermal Growth Factor)             | ORLA Proteins ORLA 167         |
| 55  | Protein ORLA 180 (Leukaemia Inhibitory Factor)         | ORLA Proteins ORLA 180         |
| 56  | Protein ORLA 190 (GM-Colony Stimulating Factor)        | ORLA Proteins ORLA 190         |
| 57  | Protein ORLA 18 (Protein A)                            | ORLA Proteins ORLA 18          |
| 58  | Protein ORLA 85 (Protein G)                            | ORLA Proteins ORLA 85          |

**Table S3. Primary and secondary antibodies used for immunofluorescence, related to immune-fluorescent staining in Experimental Procedures .**

| <b>Primary Antibody<br/>[Catalogue Number]</b> | <b>Species</b> | <b>Supplier of<br/>Primary<br/>Antibody</b>            | <b>Secondary Antibody<br/>[Catalogue number]</b> | <b>Supplier of<br/>Secondary<br/>Antibody</b> |
|------------------------------------------------|----------------|--------------------------------------------------------|--------------------------------------------------|-----------------------------------------------|
| Albumin (ALB)<br>[A80-129A]                    | Goat           | Bethyl                                                 | Alexa 647 Donkey Anti-Goat<br>[A21447]           | Thermo Scientific                             |
| A1AT<br>[HM2358]                               | Mouse          | Hycult                                                 | Alexa 488 donkey anti mouse<br>[R37114]          | Thermo Scientific                             |
| Alpha-fetoprotein (AFP)<br>[AB3980]            | Mouse          | Abcam                                                  | Alexa 568 Donkey Anti-Mouse<br>[A10037]          | Thermo Scientific                             |
| CYP2A6<br>[Nil]                                | Hen            | Collaborator<br><br>(University of<br>Eastern Finland) | Alexa 488 Donkey Anti-Hen<br>[703-545-155]       | Jackson Immuno-<br>Research<br>Laboratories   |
| HNF4 $\alpha$<br>[AB92378]                     | Rabbit         | Abcam                                                  | Alexa 568 Donkey Anti-Rabbit<br>[A10042]         | Thermo Scientific                             |

**Table S4. Human Taqman probe and primers for RT-PCR analysis were from Thermo Fisher Scientific, related to Real-Time PCR analysis in Experimental Procedures**

| Target             | Cat           | Dye |
|--------------------|---------------|-----|
| ACTB (Housekeeper) | Hs01060665_g1 | VIC |
| ALBUMIN            | Hs00609411_m1 | FAM |
| HNF4A              | Hs00230853_m1 | FAM |
| ASGR1              | Hs01005019_m1 | FAM |
| CEBP/A             | Hs00269972_s1 | FAM |
| CYP1A1             | Hs01054797_g1 | FAM |
| CYP2C9             | Hs02383631_s1 | FAM |

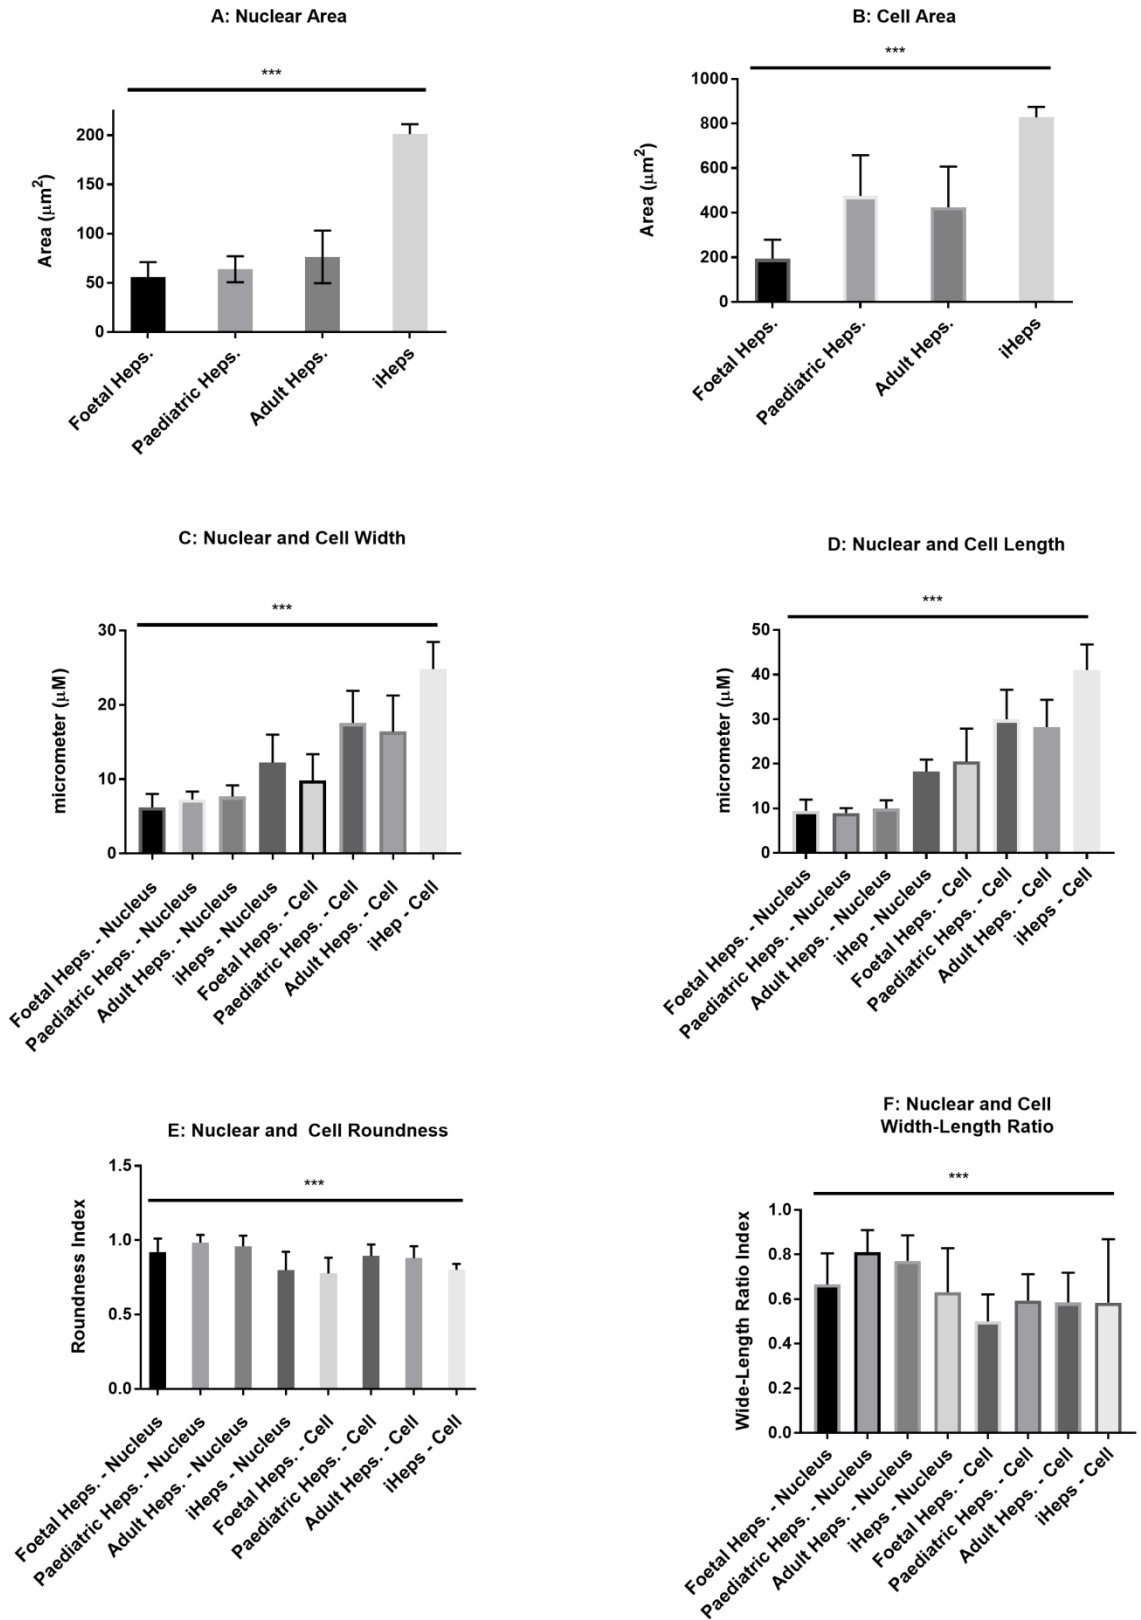

Figure S1. Measured morphological parameters of human hepatocytes by A: nuclear area, B: cell area, C: nuclear and cell width, D: nuclear and cell length, E: nuclear and cell roundness and F: nuclear and cell width-length ratio, related to text in Results section.

(A)

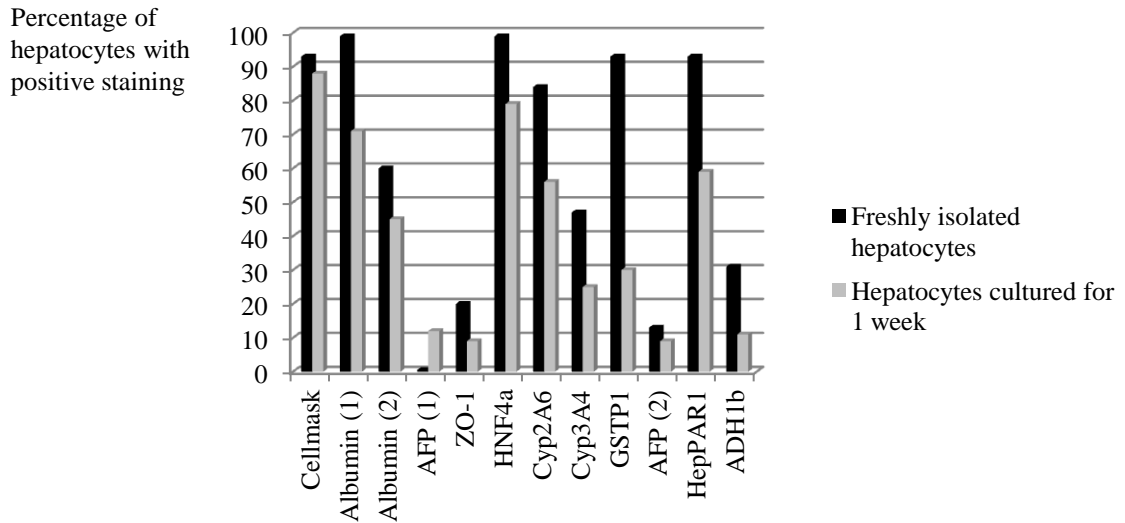

(B)

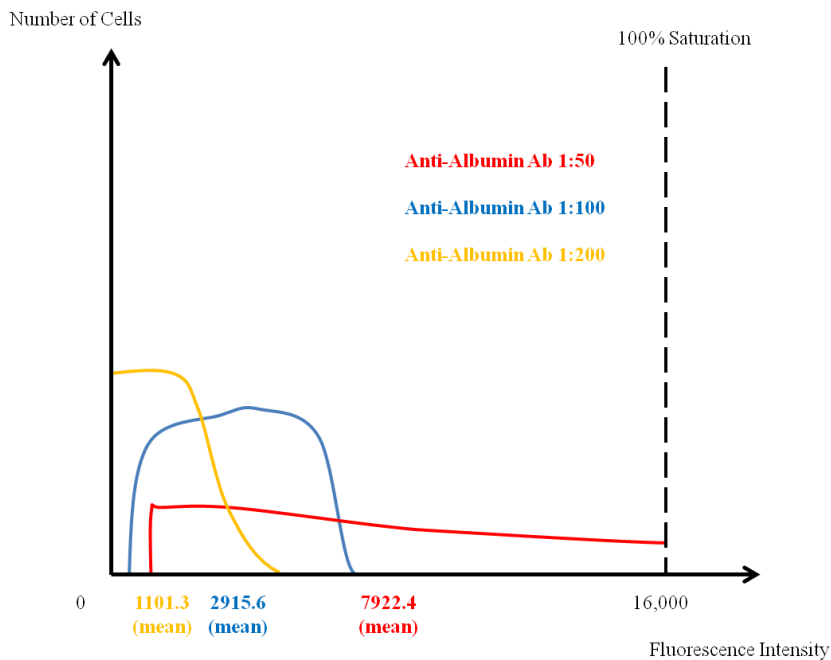

Excitation was fixed at 100% and exposure time was 200ms

Increasing excitation and exposure times stretched the graphs towards the right and caused more cells to approach 100% saturation.

Decreasing excitation and exposure times resulted in a left shift of the graphs towards under-capture of hepatocyte populations.

Figure S2. (A) Performance of various immuno-fluorescent antibodies evaluated to screen for hepatocyte likeness (B) High concentrations of Albumin antibody (1:50) resulted in a proportion of cells with 100% saturation. Low concentrations of Albumin antibody (1:200) resulted in under-capture of the cell population with weak staining in a significant proportion of hepatocytes. The optimum concentration of albumin antibody was found to be 1:100. All experiments were performed on 3 separate populations of adult hepatocytes. Figure S2 is related to the text in the Results section.



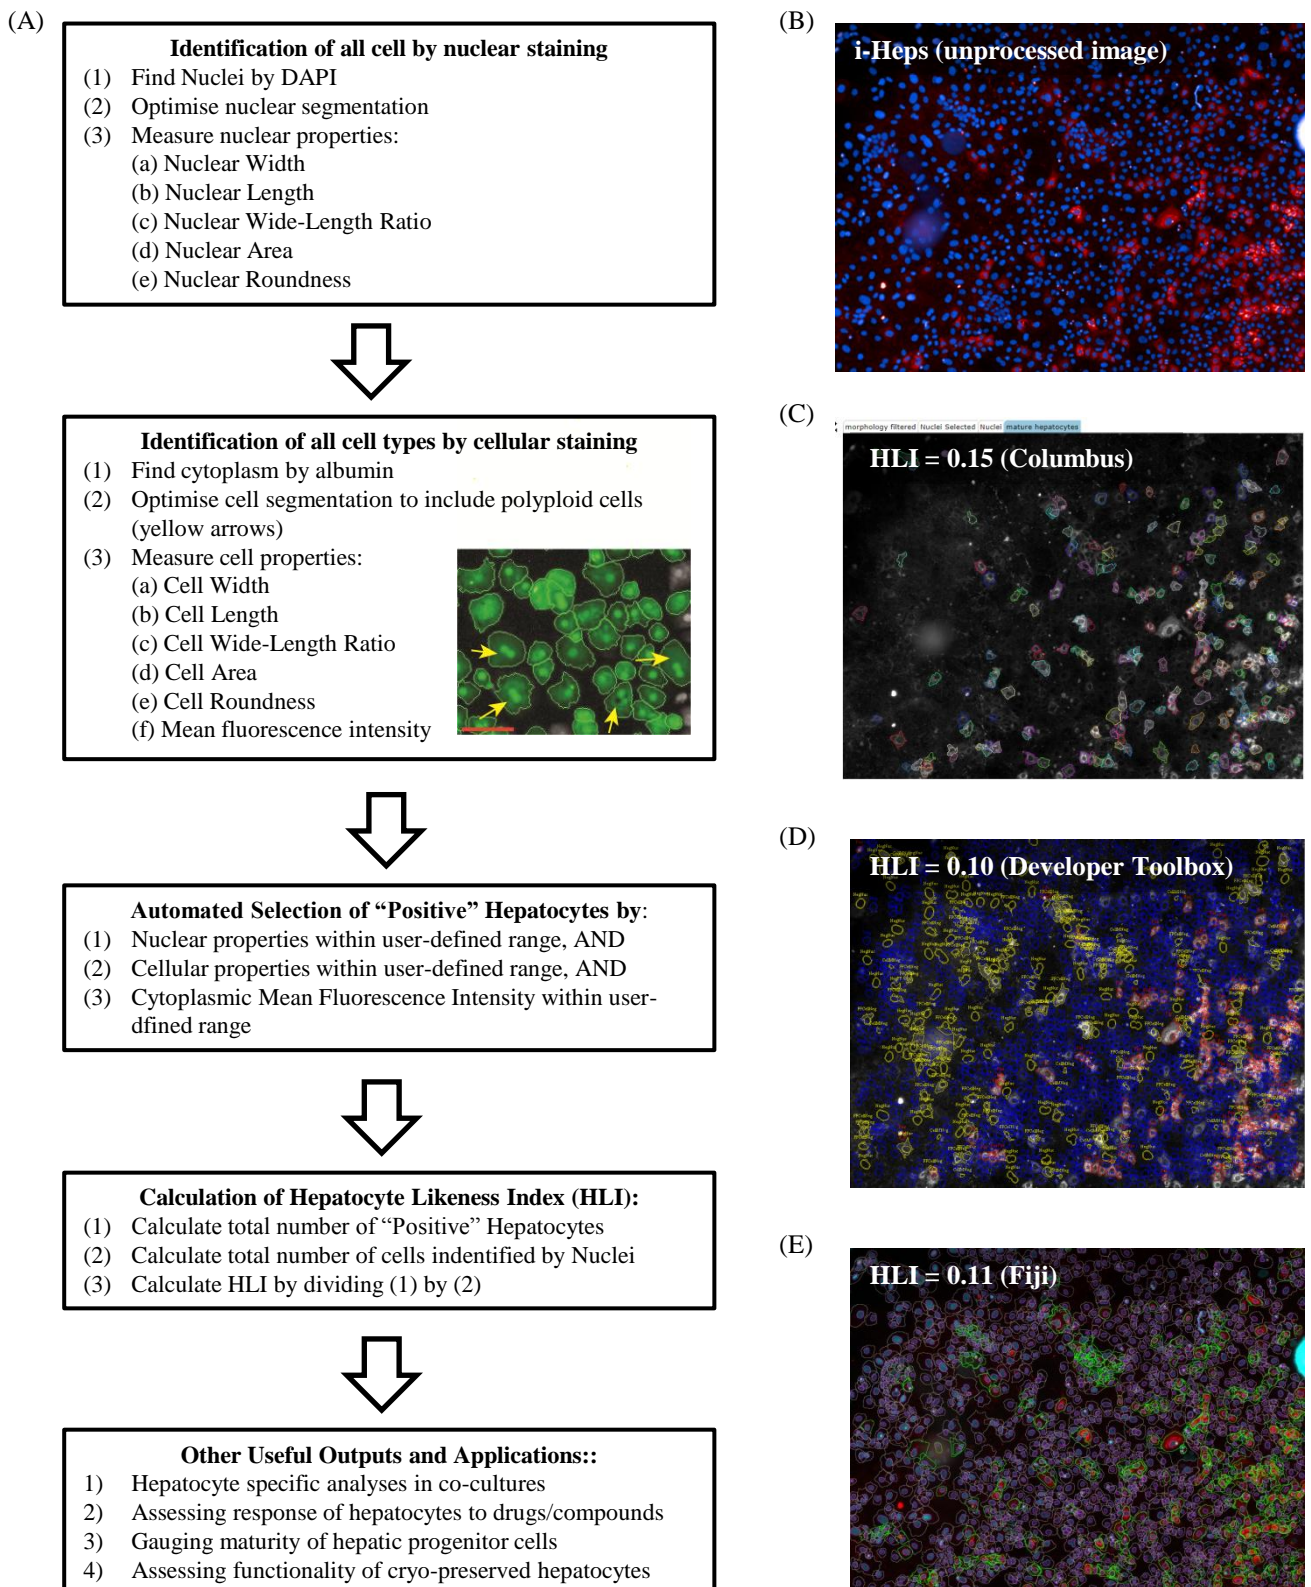

Figure S3. (A) Steps in developing our (Columbus) pipeline using “building blocks” for the derivation of the Hepatocyte Likeness Index; HLI. (B) Unprocessed, reference image of i-Heps that the following pipelines were tested against: (C) Columbus pipeline identifies and highlights mature hepatocytes in grey. (D) Developer Toolbox pipeline identifies mature hepatocytes and highlights these cells in red. (E) ImageJ pipeline identifies mature hepatocytes and highlights these cells in green. (D) and (E) are prototype pipelines created to demonstrate the reproducibility of our Columbus algorithm. (B) to (E) is a selected image from 3 experimental replicates using i-Heps derived from  $n=3$  human iPS cell lines. Pipelines available upon request. Figure S3 is related to text in Results section.

**Figure S4.** Forward and reverse primers designed for RT-qPCR using PrimerQuest tool (Integrated DNA Technologies), related to Real Time PCR analysis in Experimental Procedures section . The sequences were analyzed using BLAST for specificity for the target sequence at used at 250nM concentration. ALB: albumin, AFP:  $\alpha$ -fetoprotein, ACTB:  $\beta$ -actin, FOXA1: forkhead box protein A1, CYP3A4: cytochrome P3A4, HNF4A: hepatocyte nuclear factor 4 alpha,

| <b>Target</b> | <b>Forward (5'-3')</b>  | <b>Reverse (5'-3')</b>  |
|---------------|-------------------------|-------------------------|
| <b>ALB</b>    | CGTCGAGATGCACACAAGA     | GATACTGAGCAAAGGCAATCAAC |
| <b>AFP</b>    | TGAATCCAGAACACTGCATAGAA | TATGGTAGCCAGGTCAGCTA    |
| <b>ACTB</b>   | CTTCCTTCCTGGGCATGG      | GTACAGGTCTTTGCGGATGT    |
| <b>FOXA1</b>  | AGGGCTGGATGGTTGTATTG    | GAGTAGGCCTCCTGCGT       |
| <b>CYP3A4</b> | CCTGGTGCTCCTCTATCTATATG | AGCCCTTATGGTAGGACAAA    |
| <b>HNF4A</b>  | ACATGTACTCCTGCAGATTTAG  | CCCGGAAGCATTTCCTTGA     |
